# Supplementary material
Source: PubMed Central journal article supplement (PMC8511216)
Supplement: NIHMS1721756-supplement-1.pdf [file NIHMS1721756-supplement-1.pdf]

## ONLINE REPOSITORY

RESULTS FROM CRUDE ANALYSIS OF  
ASSOCIATION OF PRENATAL VITAMIN D  
SUFFICIENCY WITH OTHER OUTCOMES

The crude analysis also detected significant associations between prenatal vitamin D status and both food sensitization and any sensitization at age 3 years ( $P$  for trend = .04;  $P$  for trend = .03, respectively). Finally, the crude analysis also revealed significantly reduced food sensitization, any sensitization, and total IgE levels at

age 3 years in offspring of mothers who had vitamin D sufficiency in the early and late prenatal period compared with those with vitamin D insufficiency in early and late pregnancy (odds ratio = 0.57, 95% confidence interval [CI] 0.33-0.98,  $P$  = .04; odds ratio = 0.59, 95% CI 0.35-0.98,  $P$  = .04; and  $\beta$  = -0.57, 95% CI -0.97 to -0.16,  $P$  = .01, respectively). A similar trend in these associations was observed at age 6 years but did not reach the level of significance (Table II). These findings were all attenuated in adjusted analyses, which suggests that confounding may have contributed to the observed associations.

**TABLE E1.** Characteristics of subjects included and excluded from analysis of allergic outcomes at age 6 y<sup>a</sup>

| Subject characteristic                                  | Included<br>(n = 414) | Excluded<br>(n = 392) | <i>P</i> |
|---------------------------------------------------------|-----------------------|-----------------------|----------|
| Maternal age, y (mean, SD)                              | 27.4 (5.4)            | 27.4 (5.6)            | .99      |
| Maternal education: less than college graduation        | 274 (66.2)            | 259 (66.1)            | 1.00     |
| Treatment arm: high-dose prenatal vitamin D (4400 IU/d) | 213 (51.4)            | 192 (49.0)            | .53      |
| Study site                                              |                       |                       | .88      |
| Boston                                                  | 120 (29.0)            | 120 (30.6)            |          |
| San Diego                                               | 143 (34.5)            | 131 (33.4)            |          |
| St Louis                                                | 151 (36.5)            | 141 (36.0)            |          |
| Female sex                                              | 190 (45.9)            | 195 (49.7)            | .31      |
| Child Race/ethnicity                                    |                       |                       | .30      |
| Black, non-Hispanic                                     | 169 (40.8)            | 148 (37.8)            |          |
| Hispanic/other                                          | 171 (41.3)            | 157 (40.1)            |          |
| White, non-Hispanic                                     | 74 (17.9)             | 87 (22.2)             |          |
| Child body mass index at age 6 y (mean [SD])            | 16.87 (2.83)          | 16.88 (2.96)          | .96      |
| Preterm birth                                           | 38 (9.2)              | 35 (9.0)              | .82      |
| Birth mode: vaginal                                     | 290 (70.0)            | 277 (70.7)            | .97      |
| Perinatal antibiotics                                   | 170 (41.1)            | 167 (42.9)            | .64      |
| Breastfeeding $\geq$ 4 mo                               | 141 (36.5)            | 106 (30.1)            | .08      |
| Season of birth                                         |                       |                       | .37      |
| Fall                                                    | 118 (28.5)            | 134 (34.2)            |          |
| Spring                                                  | 93 (22.5)             | 82 (20.9)             |          |
| Summer                                                  | 108 (26.1)            | 91 (23.2)             |          |
| Winter                                                  | 95 (22.9)             | 85 (21.7)             |          |
| Older siblings: yes                                     | 235 (56.8)            | 200 (51.0)            | .12      |
| Daycare by age 6 y                                      | 232 (60.1)            | 208 (69.1)            | .02      |
| Cat in home                                             | 44 (10.8)             | 39 (10.8)             | 1.00     |
| Dog in home                                             | 87 (21.5)             | 81 (22.9)             | .71      |
| Parental asthma                                         | 238 (57.5)            | 214 (54.6)            | 0.45     |
| Parental hay fever                                      | 320 (77.3)            | 323 (82.4)            | .09      |
| Parental eczema                                         | 178 (43.0)            | 171 (42.5)            | .95      |
| Asthma by age 6 y                                       | 102 (24.6)            | 96 (24.5)             | 1.00     |

Missingness includes breastfeeding for 4 mo (n = 68), cat (n = 40), dog (n = 49), daycare status (n = 119), preterm birth (n = 2), child body mass index at age 6 y (n = 270), and perinatal antibiotics (n = 3).

<sup>a</sup>Data are given as n (%) of individuals unless otherwise specified.

**TABLE E2.** Baseline characteristics in study population by primary outcome at age 3 y<sup>a</sup>

| Subject characteristic                                  | Aeroallergen sensitization<br>(n = 148) | Nonsensitized<br>(n = 383) | <i>P</i>          |
|---------------------------------------------------------|-----------------------------------------|----------------------------|-------------------|
| Maternal age, y (mean [SD])                             | 27.1 (5.4)                              | 27.3 (5.6)                 | .62               |
| Maternal education: less than college graduation        | 103 (69.6)                              | 245 (64.0)                 | .26               |
| Treatment arm: high-dose prenatal vitamin D (4400 IU/d) | 69 (46.6)                               | 205 (53.5)                 | .18               |
| Study site                                              |                                         |                            | .84               |
| Boston                                                  | 32 (21.6)                               | 90 (23.5)                  |                   |
| San Diego                                               | 50 (33.8)                               | 132 (34.5)                 |                   |
| St Louis                                                | 66 (44.6)                               | 161 (42.0)                 |                   |
| Female sex                                              | 62 (41.9)                               | 187 (48.8)                 | .18               |
| Child race/ethnicity                                    |                                         |                            | .32               |
| Black                                                   | 69 (46.6)                               | 151 (39.4)                 |                   |
| Hispanic/other                                          | 52 (35.1)                               | 154 (40.2)                 |                   |
| White                                                   | 27 (18.2)                               | 78 (20.4)                  |                   |
| Child body mass index at age 3 y (mean [SD])            | 16.68 (1.95)                            | 16.57 (1.68)               | .53               |
| Preterm birth                                           | 14 (9.5)                                | 39 (10.2)                  | .93               |
| Birth mode: vaginal                                     | 97 (65.5)                               | 268 (70.0)                 | .38               |
| Perinatal antibiotics                                   | 68 (45.9)                               | 163 (42.6)                 | .54               |
| Breastfeeding >4 mo                                     | 58 (39.2)                               | 144 (37.6)                 | .68               |
| Season of birth                                         |                                         |                            | .78               |
| Fall                                                    | 47 (31.8)                               | 119 (31.1)                 |                   |
| Spring                                                  | 36 (24.3)                               | 85 (22.2)                  |                   |
| Summer                                                  | 37 (25.0)                               | 91 (23.8)                  |                   |
| Winter                                                  | 28 (18.9)                               | 88 (23.0)                  |                   |
| Older siblings                                          | 87 (58.8)                               | 220 (57.4)                 | .86               |
| Daycare by age 3 y                                      | 82 (55.4)                               | 208 (54.3)                 | .85               |
| Cat in home                                             | 19 (12.8)                               | 48 (12.5)                  | 1.00              |
| Dog in home                                             | 31 (20.9)                               | 104 (27.2)                 | .13               |
| Parental asthma                                         | 99 (66.9)                               | 208 (54.3)                 | .01 <sup>b</sup>  |
| Parental hay fever                                      | 116 (78.4)                              | 303 (79.1)                 | .95               |
| Parental eczema                                         | 68 (46.3)                               | 156 (40.8)                 | .30               |
| Asthma by age 3 y                                       | 35 (23.6)                               | 50 (13.1)                  | .004 <sup>b</sup> |

Missingness includes breastfeeding for 4 mo (n = 35), cat (n = 10), dog (n = 12), daycare status (n = 27), body mass index (n = 1), and parental eczema (n = 2).

<sup>a</sup>Data are given as n (%) unless otherwise specified.

<sup>b</sup>Indicates statistical significance ( $P$  < .05).

**TABLE E3.** Allergic outcomes at age 3 y<sup>a</sup>

| Subject characteristic                                           | Univariable            |                  |                    | Multivariable <sup>a</sup>   |                  |                    |
|------------------------------------------------------------------|------------------------|------------------|--------------------|------------------------------|------------------|--------------------|
|                                                                  | Odds ratio (95% CI)    | <i>P</i>         | <i>P</i> for trend | Adjusted odds ratio (95% CI) | <i>P</i>         | <i>P</i> for trend |
| <b>Aeroallergen sensitization</b>                                |                        |                  |                    |                              |                  |                    |
| Insufficient in early and late prenatal <sup>b</sup> (n = 202)   | Reference              | —                | .74                | Reference                    | —                | .99                |
| Early insufficient/late sufficient (n = 199)                     | 0.9 (0.58-1.4)         | .64              |                    | 0.92 (0.59-1.45)             | .72              |                    |
| Sufficient in early and late prenatal (n = 84)                   | 0.94 (0.52-1.64)       | .82              |                    | 1.05 (0.56-1.95)             | .87              |                    |
| <b>Clinical allergic rhinitis</b>                                |                        |                  |                    |                              |                  |                    |
| Insufficient in early and late prenatal (n = 202)                | Reference              | —                | .25                | Reference                    | —                | .45                |
| Early insufficient/late sufficient (n = 199)                     | 0.75 (0.46-1.22)       | .25              |                    | 0.79 (0.47-1.30)             | .35              |                    |
| Sufficient in early and late prenatal (n = 84)                   | 0.74 (0.38-1.38)       | .36              |                    | 0.82 (0.39-1.67)             | .60              |                    |
| <b>Aeroallergen sensitization and clinical allergic rhinitis</b> |                        |                  |                    |                              |                  |                    |
| Insufficient in early and late prenatal (n = 202)                | Reference              | —                | .10                | Reference                    | —                | .11                |
| Early insufficient/late sufficient (n = 199)                     | 0.35 (0.13-0.82)       | .02 <sup>c</sup> |                    | 0.34 (0.13-0.82)             | .02 <sup>c</sup> |                    |
| Sufficient in early and late prenatal (n = 84)                   | 0.61 (0.20-1.58)       | .34              |                    | 0.60 (0.18-1.76)             | .38              |                    |
| <b>Food sensitization</b>                                        |                        |                  |                    |                              |                  |                    |
| Insufficient in early and late prenatal (n = 202)                | Reference              | —                | .04 <sup>c</sup>   | Reference                    | —                | .21                |
| Early insufficient/late sufficient (n = 199)                     | 0.80 (0.53-1.19)       | .27              |                    | 0.85 (0.56-1.28)             | .41              |                    |
| Sufficient in early and late prenatal (n = 84)                   | 0.57 (0.33-0.98)       | .04 <sup>c</sup> |                    | 0.69 (0.37-1.24)             | .18              |                    |
| <b>Any sensitization</b>                                         |                        |                  |                    |                              |                  |                    |
| Insufficient in early and late prenatal (n = 202)                | Reference              | —                |                    | Reference                    | —                |                    |
| Early insufficient/late sufficient (n = 199)                     | 0.72 (0.48-1.06)       | .10              | .03 <sup>c</sup>   | 0.77 (0.51-1.15)             | 0.20             | .17                |
| Sufficient in early and late prenatal (n = 84)                   | 0.59 (0.35-0.98)       | .04 <sup>c</sup> |                    | 0.72 (0.40-1.26)             | 0.25             |                    |
| <b>Clinical eczema</b>                                           |                        |                  |                    |                              |                  |                    |
| Insufficient in early and late prenatal (n = 202)                | Reference              | —                | .30                | Reference                    | —                | .72                |
| Early insufficient/late sufficient (n = 199)                     | 0.89 (0.56-1.41)       | .61              |                    | 1.01 (0.63-1.64)             | 0.96             |                    |
| Sufficient in early and late prenatal (n = 84)                   | 0.72 (0.37-1.32)       | .30              |                    | 1.17 (0.57-2.34)             | 0.67             |                    |
| <b>Total IgE</b>                                                 |                        |                  |                    |                              |                  |                    |
| Insufficient in early and late prenatal (n = 202)                | Reference              | —                | .01 <sup>c</sup>   | Reference                    | —                | .15                |
| Early insufficient/late sufficient (n = 199)                     | −0.08 (−0.39 to 0.23)  | .62              |                    | −0.01 (−0.32 to 0.30)        | 0.97             |                    |
| Sufficient in early and late prenatal (n = 84)                   | −0.57 (−0.97 to −0.16) | .01 <sup>c</sup> |                    | −0.38 (−0.80 to 0.05)        | 0.08             |                    |

CI, confidence interval.

<sup>a</sup>Adjusted for maternal education, study site, preterm birth, child sex, child race and ethnicity, parental asthma, and child body mass index at age 3 y.<sup>b</sup>In the following order: baseline prenatal vitamin D (10-18 wk gestational age), third trimester prenatal vitamin D (32-38 wk gestational age).<sup>c</sup>Indicates statistical significance (*P* < .05).

**TABLE E4.** Treatment assignment by vitamin D sufficiency group at age 6 y

| Subject characteristic                            | High-dose vitamin D (n = 204) | Low-dose vitamin D (n = 182) |
|---------------------------------------------------|-------------------------------|------------------------------|
| Insufficient in early and late prenatal (n = 165) | 40 (24%)                      | 125 (76%)                    |
| Early insufficient/late sufficient (n = 157)      | 129 (82%)                     | 28 (18%)                     |
| Sufficient in early and late prenatal (n = 64)    | 35 (55%)                      | 29 (45%)                     |

**TABLE E5.** Aeroallergen sensitization stratified by asthma status at age 3 y

| Subject characteristic                  | Asthma (n = 85)            |    |                                                  |      | No asthma (n = 446)        |     |                                                  |      |
|-----------------------------------------|----------------------------|----|--------------------------------------------------|------|----------------------------|-----|--------------------------------------------------|------|
|                                         | Aeroallergen sensitization |    | Adjusted odds ratio<br>(95% confidence interval) | P    | Aeroallergen sensitization |     | Adjusted odds ratio<br>(95% confidence interval) | P    |
|                                         | Yes                        | No |                                                  |      | Yes                        | No  |                                                  |      |
| Insufficient in early and late prenatal | 16                         | 24 | Reference                                        | —    | 42                         | 120 | Reference                                        | —    |
| Early insufficient/late sufficient      | 12                         | 15 | 1.47 (0.43-5.13)                                 | 0.54 | 41                         | 131 | 0.91 (0.54-1.51)                                 | 0.70 |
| Sufficient in early and late prenatal   | 3                          | 4  | 1.02 (0.11-8.99)                                 | 0.98 | 20                         | 57  | 1.16 (0.58-2.26)                                 | 0.67 |
